1 Neanderthal Introgression Shaped Human Circadian Traits

2

3 Keila Velazquez-Arcelay<sup>1</sup>, Laura L. Colbran<sup>2</sup>, Evonne McArthur<sup>3</sup>, Colin Brand<sup>4,5</sup>, Justin  
4 Siemann<sup>1</sup>, Douglas McMahon<sup>1</sup>, and John A. Capra<sup>4,5\*</sup>

5

6 <sup>1</sup> Department of Biological Sciences, Vanderbilt University

7 <sup>2</sup> Department of Genetics, Perelman School of Medicine, University of Pennsylvania

8 <sup>3</sup> Vanderbilt University School of Medicine

9 <sup>4</sup> Department of Epidemiology and Biostatistics, University of California, San Francisco

10 <sup>5</sup> Bakar Computational Health Sciences Institute, University of California, San Francisco

11

12 \* Corresponding author: [tony@capralab.org](mailto:tony@capralab.org)

13

14 **ABSTRACT**

15 *Introduction:* When the ancestors of modern Eurasians migrated out of Africa and interbred with  
16 Eurasian archaic hominins, namely Neanderthals and Denisovans, DNA of archaic ancestry  
17 integrated into the genomes of anatomically modern humans. This process potentially  
18 accelerated adaptation to Eurasian environmental factors, including reduced ultra-violet radiation  
19 and an increased variation in seasonal dynamics. However, whether these groups differed  
20 substantially in circadian biology, and whether archaic introgression adaptively contributed to  
21 human chronotypes remains unknown.

22 *Results:* Here we traced the evolution of chronotype based on genomes from archaic hominin  
23 and present-day humans. First, we inferred differences in circadian gene sequences, splicing, and  
24 regulation between archaic hominins and modern humans. We identified 28 circadian genes  
25 containing variants likely to alter splicing in archaics (e.g., *CLOCK*, *PER2*, *RORB*, *RORC*), and  
26 16 circadian genes likely divergently regulated between present-day humans and archaic  
27 hominins, including *RORA*. These differences suggest the potential for introgression to modify  
28 circadian gene expression. Testing this hypothesis, we found that introgressed variants are  
29 enriched among eQTLs for circadian genes. Supporting the functional relevance of these  
30 regulatory effects, we found that many introgressed alleles have strong associations with  
31 chronotype. Strikingly, the strongest introgressed effects on chronotype increase morningness,  
32 which is consistent with adaptations to high latitude in other species. Finally, we identified 26  
33 circadian loci with evidence of adaptive introgression, including *PER2* and *MYBBP1A*.

34 *Conclusions:* These findings identify differences in circadian gene regulation between modern  
35 humans and archaic hominins and support the contribution of introgression via coordinated  
36 effects on variation in human chronotype.

37

38

39 **Keywords:** circadian biology, chronotype, Neanderthals, adaptive introgression

40

41

42 **SIGNIFICANCE STATEMENT**

43

44 Interbreeding between modern humans and Neanderthals created the potential for adaptive  
45 introgression as humans moved into new environments that had been populated by Neanderthals  
46 for hundreds of thousands of years. Here we discover substantial lineage-specific genetic  
47 differences in circadian genes and their regulatory elements between humans and Neanderthals.  
48 We then show that introgressed archaic alleles are enriched for effects on circadian gene  
49 regulation and consistently increase propensity for morningness in modern Europeans. These  
50 results substantially expand our understanding of how the genomes of humans and our closest  
51 relatives responded to living in environments with different light/dark cycles, and they  
52 demonstrate a coordinated contribution of archaic admixture to modern human chronotype in a  
53 direction that is consistent with adaptation to higher latitudes.

## 54 INTRODUCTION

55

56 All anatomically modern humans (AMH) trace their origin to the African continent around 300  
57 ka (Hublin et al. 2017; Stringer 2016), where environmental factors shaped many of their  
58 biological features. Approximately seventy-thousand years ago (Bae, Douka, and Petraglia  
59 2017), the ancestors of modern Eurasian AMH began to migrate out of Africa, where they were  
60 exposed to diverse new environments. In Eurasia, the novel environmental factors included  
61 greater seasonal variation in temperature and photoperiod.

62 Changes in the pattern and level of light exposure has biological and behavioral  
63 consequences in organisms. For example, *D. melanogaster* that are native to Europe harbor a  
64 polymorphism in *timeless*, a key gene in the light response of the circadian system, that follows a  
65 latitudinal cline in allele frequency (Sandrelli et al. 2007; Tauber et al. 2007). This  
66 polymorphism is an insertion in the 5' region of the gene, resulting in two initiation codons and  
67 as a result two isoforms of the protein: L-TIM with prevalence in southern Europe and S-TIM  
68 with prevalence in northern Europe. The isoforms have different levels of affinity to  
69 cryptochrome (CRY), creating a change in photosensitivity and altering the length of the period.  
70 Another example is found in pacific salmon. The Chinook salmon (*Oncorhynchus tshawytscha*)  
71 populations show a latitudinal-cline in the frequency and length of repeat motifs in the gene  
72 *OtsClock1b* (O'Malley, Ford, and Hard 2010; O'Malley and Banks 2008). Thus, this locus is  
73 under selection associated with latitude and photoperiod. The evolution of circadian adaptation  
74 to diverse environments has been widely studied in insects, plants (Q. Zhang et al. 2008; Michael  
75 et al. 2003), and fishes, but it is understudied in humans. Adaptive processes could have helped  
76 to align human biology and chronotype to new natural conditions.

77 Previous studies in humans found a correlation between latitude and chronotype  
78 (morningness vs. eveningness) variation (Leocadio-Miguel et al. 2017; Lowden et al. 2018;  
79 Randler and Rahafar 2017) and a latitudinal-cline in circadian allele frequencies (Putilov et al.  
80 2019; Putilov, Dorokhov, and Poluektov 2018; Dorokhov et al. 2018), highlighting the  
81 contribution of the environment to circadian behavior and circadian biology. Many human health  
82 effects are linked to the misalignment of chronotype (Knutson and von Schantz 2018), including  
83 cancer, obesity (Gan et al. 2018; Gyarmati et al. 2016; Papantoniou et al. 2016; 2017; Shi et al.  
84 2020; Yousef et al. 2020), and diabetes (Gan et al. 2015; Larcher et al. 2015; 2016). There is also  
85 evidence of a correlation between evening chronotype and mood disorders, most notably  
86 seasonal affective disorder (SAD), depression, and worsening of bipolar disorder episodes  
87 (Srinivasan et al. 2006; Taylor and Hasler 2018; Kivelä, Papadopoulos, and Antypa 2018). Thus,  
88 we hypothesize that the differences in geography and environment encountered by early AMH  
89 populations moving into higher latitudes created potential for circadian misalignment and health  
90 risk.

91 Although AMHs arrived in Eurasia ~70 ka, other hominins (e.g. Neanderthals and  
92 Denisovans) lived there for more than 400 ka (Meyer et al. 2016; 2014; Arnold et al. 2014).  
93 These archaic hominins diverged from AMHs around 700 ka (Gómez-Robles 2019; Nielsen et al.  
94 2017; Meyer et al. 2012; Prüfer et al. 2014; 2017; Mafessoni et al. 2020), and as a result, the  
95 ancestors of AMHs and archaic hominins evolved under different environmental conditions.  
96 While there was substantial variation in the latitudinal ranges of each group, the Eurasian  
97 hominins largely lived at consistently higher latitudes and, thus, were exposed to higher  
98 amplitude seasonal variation in photoperiods. Given the influence of environmental cues on

99 circadian biology, we hypothesized that these separate evolutionary histories produced  
100 differences in circadian traits adapted to the distinct environments.

101 When AMH migrated into Eurasia, they interbred with the archaic hominins that were  
102 native to the continent, initially with Neanderthals (Green et al. 2010; Villanea and Schraiber  
103 2019) around 60 ka (Sankararaman et al. 2012; Skoglund and Mathieson 2018) and later with  
104 Denisovans (Jacobs et al. 2019). Due to this, a substantial fraction (>40%) of the archaic  
105 variation remains in present-day Eurasians (Skov et al. 2020; Vernot and Akey 2014), although  
106 each human individual carries only ~2% DNA of archaic ancestry (Vernot et al. 2016; Prüfer et  
107 al. 2017). Most of the archaic ancestry in AMH was subject to strong negative selection, but  
108 some of these introgressed alleles remaining in AMH populations show evidence of adaptation  
109 (Gower et al. 2021; Racimo et al. 2015). Archaic alleles have been associated with differences in  
110 hemoglobin levels at higher altitude in Tibetans, immune resistance to new pathogens, levels of  
111 skin pigmentation, and fat composition (Dannemann and Kelso 2017; Racimo et al. 2015; 2017;  
112 Racimo, Marnetto, and Huerta-Sánchez 2017; Huerta-Sánchez et al. 2014; McArthur, Rinker,  
113 and Capra 2021). Introgressed alleles are also associated with chronotype (Dannemann and  
114 Kelso 2017), suggesting a potential adaptive pressure stemming from migration to higher  
115 latitudes. Summarizing effects across introgressed alleles, chronotype was also moderately  
116 enriched for heritability in introgressed regions (McArthur, Rinker, and Capra 2021).

117 Motivated by the potential for a role of archaic introgression in AMH circadian variation,  
118 we explore two related questions: 1) Can comparative genomic analysis identify differences in  
119 AMH and archaic hominin circadian biology?, and 2) Do introgressed archaic alleles influence  
120 human circadian biology? Understanding the ancient history and evolution of chronotypes in  
121 humans will shed light on human adaptation to high latitudes and provide context for the genetic  
122 basis for the modern misalignment caused by the development of technology and night  
123 shiftwork.

124

125

126

## 127 **RESULTS**

128

### 129 **Did archaic hominins and modern humans diverge in circadian biology?**

130 Following divergence ~700,000 years ago (Gómez-Robles 2019; Nielsen et al. 2017), archaic  
131 hominins and AMH were geographically isolated, resulting in the accumulation of lineage-  
132 specific genetic variation (Figure 1). In the next several sections, we evaluate the evidence for  
133 divergence in circadian biology between archaic hominin and modern human genomes.

134

### 135 **Identifying archaic-hominin-specific circadian gene variation**

136 With the sequencing of several genomes of archaic hominins, we now have a growing, but  
137 incomplete, catalog of genetic differences specific to modern and archaic lineages. We evaluated  
138 archaic-specific variants (Kuhlwilm and Boeckx 2019) for their ability to influence proteins,  
139 splicing, and regulation of 246 circadian genes (Methods). The circadian genes were identified  
140 by a combination of literature search, expert knowledge, and existing annotations (Table S1;  
141 Figure S1; Methods).

142 We identified 1,136 archaic-specific variants in circadian genes, promoters, and  
143 candidate distal cis-regulatory elements (cCREs). The circadian genes with the most archaic-

144 specific variants are *CLDN4*, *NAMPT*, *LRPPRC*, *ATF4*, and *AHCY* (125, 112, 110, 104, 102  
 145 respectively) (Table S2).  
 146  
 147

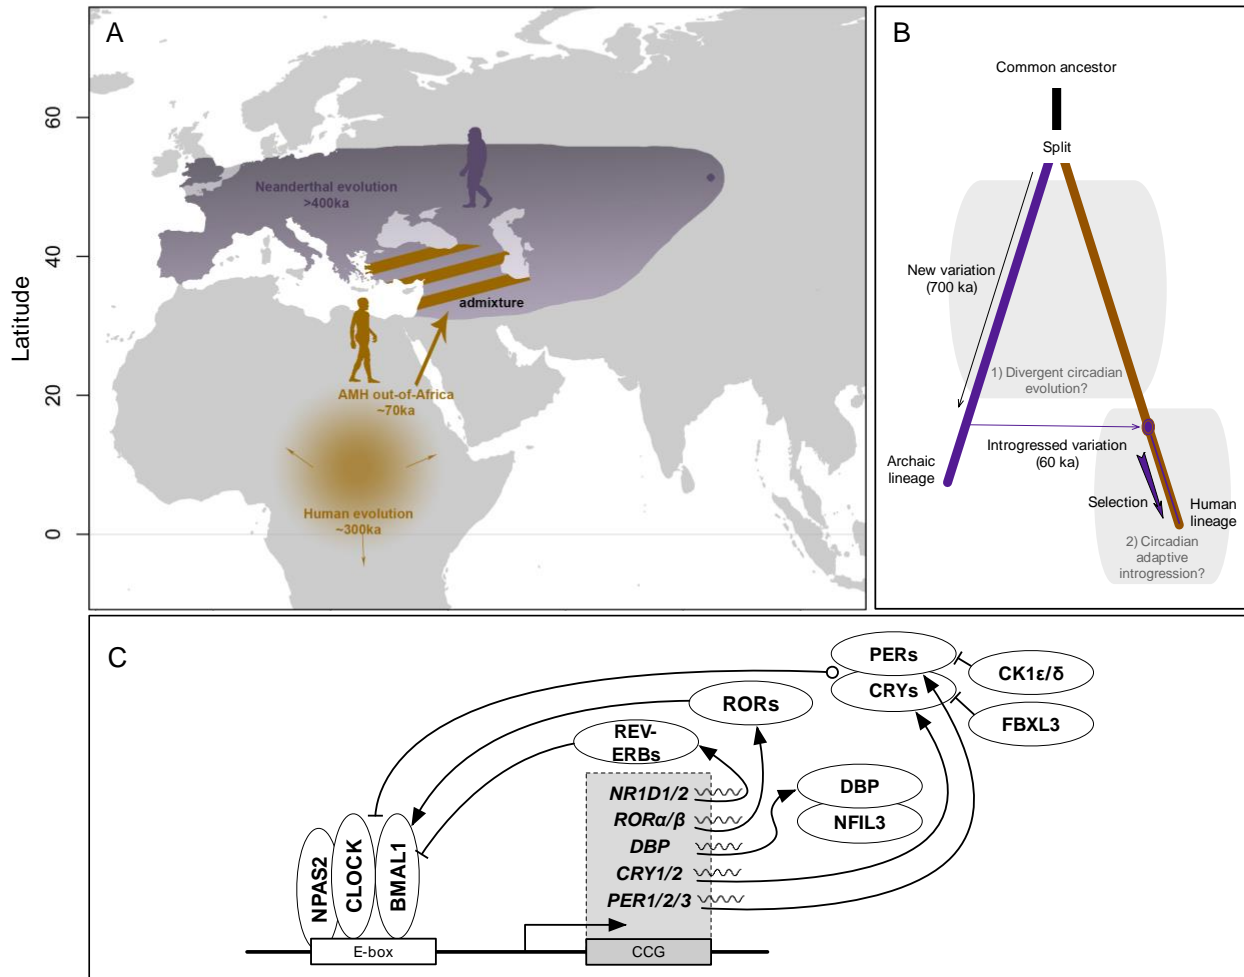

148  
 149 **Figure 1. Did the sharing of functionally diverged alleles from archaic hominins influence**  
 150 **human circadian biology?** **A)** Anatomically modern humans and archaic hominins evolved  
 151 separately at different latitudes for hundreds of thousands of years. The ancestors of modern  
 152 Eurasian humans left Africa approximately 70 thousand years ago and admixed with archaics,  
 153 likely in southwestern Asia. The shaded purple range represents the approximate Neanderthal  
 154 range. The purple dot represents the location of the sequenced Denisovan individual in the Altai  
 155 Mountains; the full range of Denisovans is currently unknown. Silhouettes from phylopic.org. **B)**  
 156 After the split between the human and archaic lineages, each group accumulated variation and  
 157 evolved in their respective environments for approximately 700 thousand years. We first test for  
 158 evidence for divergent circadian evolution during this time. Humans acquired introgressed alleles  
 159 from Neanderthals and from Denisovans around 60 and 45 thousand years ago, respectively.  
 160 These alleles experienced strong selective pressures; however, ~40% of the genome retains  
 161 archaic ancestry in some modern populations. The second question we explore is whether  
 162 introgression made adaptive contributions to human circadian biology. **C)** The core circadian  
 163 clock machinery is composed of a dimer between the CLOCK and ARNTL (BMAL1)  
 164 transcription factors, which bind to E-box enhancer elements and activate the expression of the

165 Period (*PER1/2/3*) and Cryptochrome (*CRY1/2*) genes. PERs and CRYs form heterodimers that  
 166 inhibit the positive drive of CLOCK-BMAL1 on E-boxes, inhibiting their own transcription in a  
 167 negative feedback loop. CLOCK-BMAL1 also drive the expression of *NR1D1/2* (Nuclear  
 168 Receptor Subfamily 1 Group D Member 1 and 2), *RORA/B* (RAR Related Orphan Receptor A  
 169 and B), *DBP* (D-Box Binding PAR BZIP Transcription Factor), and other clock-controlled genes  
 170 (CCG). ROR and REV-ERB are transcriptional regulators of BMAL1. CK1 binds to the  
 171 PER/CRY heterodimer, phosphorylating PER and regulating its degradation. Similarly, FBXL3  
 172 marks CRY for degradation.

173  
 174

### 175 **Fixed human- and archaic-specific variants are enriched in circadian genes and associated** 176 **regulatory elements**

177 After the archaic and AMH lineages diverged, each group accumulated genetic variation specific  
 178 to each line. Variants fixed in each lineage are likely to be enriched in genomic regions that  
 179 influence traits that experienced positive selection. We tested whether human- and archaic-  
 180 specific fixed variants are enriched compared to other sites with archaic variants in circadian  
 181 genes, their promoters, and in annotated regulatory elements within 1 Mb (Figure 2). We found  
 182 that human- and archaic-specific fixed variants are enriched in circadian genes (Fisher's exact  
 183 test; human: OR=1.84, P=7.06e-12; archaic: OR=1.13, P=0.023) and distal regulatory elements  
 184 (Fisher's exact test; human: OR=1.25, P=8.39e-4; archaic: OR=1.16, P=6.15e-5). Although  
 185 promoter regions have a similar enrichment pattern as that in gene and regulatory regions, the p-  
 186 values are high (Fisher's exact test; human: OR=1.21, P=0.65; archaic: OR=1.09, P=0.63). This  
 187 is likely due to the small number of such variants in promoters. These results suggest that both  
 188 groups had a greater divergence in genomic regions related to circadian biology than expected.  
 189

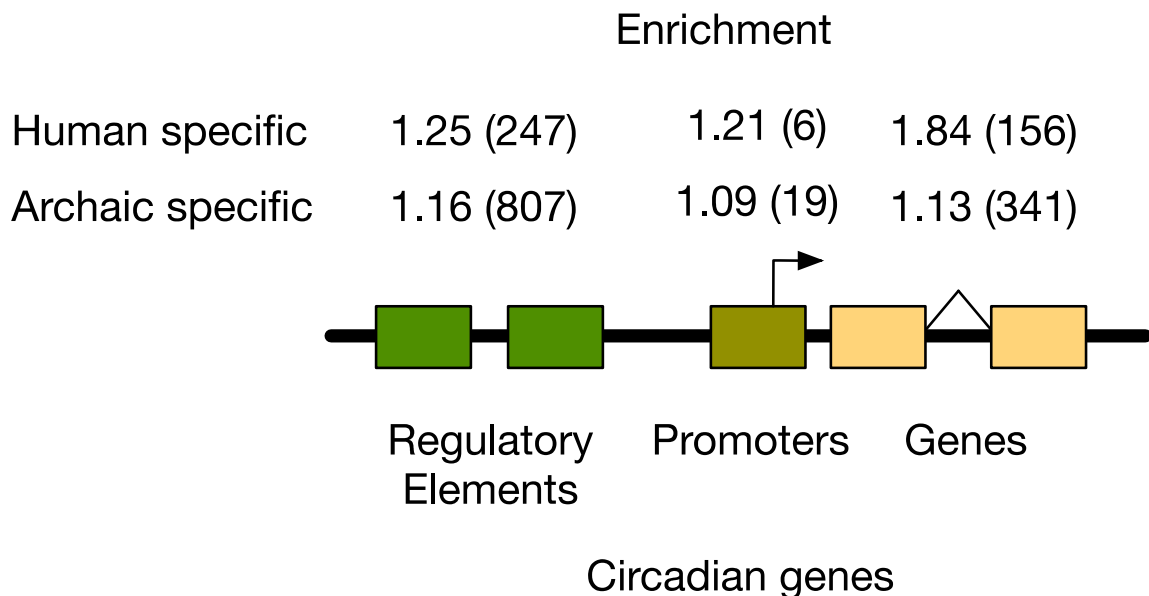

190  
 191 **Figure 2. Human- and archaic-specific fixed variants are enriched in circadian regulatory,**  
 192 **promoter, and gene regions.** Human-specific fixed variants are significantly enriched in  
 193 circadian regulatory elements (Fisher's exact: OR=1.25, P=8.39e-4) and gene regions (Fisher's  
 194 exact: OR=1.84, P=7.06e-12) compared to variants that are not fixed. Promoters show a similar  
 195 enrichment, but the higher p-value is the result of the small number of variants (Fisher's exact



196 test: OR=1.21, P=0.65). Likewise, archaic-specific variants are enriched in circadian regulatory  
197 regions (Fisher's exact: OR=1.16, P=6.15e-5) and gene regions (Fisher's exact: OR=1.13,  
198 P=0.023), with the promoters showing a similar trend (Fisher's exact test: OR=1.09, P=0.63).  
199 The number in parentheses gives the number of variants observed in each type.

200  
201

## 202 **Several core circadian genes have evidence of alternative splicing between humans and** 203 **archaic hominins**

204 We find only two archaic-specific coding variants in circadian genes: one missense and one  
205 synonymous. The missense variant (hg19: chr17\_46923411\_A\_G) is in the gene *CALCOCO2*,  
206 calcium-binding and coiled-coil domain-containing protein 2. SIFT, PolyPhen, and CADD all  
207 predict that the variant does not have damaging effects. The second variant (hg19:  
208 chr7\_119914770\_G\_T) is in the gene *KCND2*, which encodes a component of a voltage-gated  
209 potassium channels, but it is synonymous and the variant effect predictors suggest it is tolerated.

210 To explore potential splicing differences in circadian genes between humans and  
211 archaics, we applied SpliceAI to predict whether any sequence differences between modern  
212 humans and archaics are likely to modify splicing patterns. Four archaic individuals were  
213 included in this analysis (the Altai, the Vindija, the Chagyrskaya Neanderthals, and the Altai  
214 Denisovan). We found that 28 genes contained at least one archaic-specific variant predicted to  
215 result in alternative splicing in archaics. These included several of the core clock genes *CLOCK*,  
216 *PER2*, *RORB*, *RORC*, and *FBXL13* (Figure 3A,C; Table S3). For example, the variant  
217 chr2:239187088-239187089 in the 1st intron of *PER2* is predicted to result in a longer 5' UTR.  
218 The splice-altering variants were largely specific to the two different archaic lineages (Figure 3A),  
219 with 13 specific to the Denisovan, eight shared among the three Neanderthals, and only one  
220 shared among all four archaic individuals.

221

## 222 **Circadian gene regulatory divergence between humans and archaic hominins**

223 Given the enrichment of variants in regulatory regions of circadian genes, we sought to explore  
224 the potential for differences in circadian gene regulation between humans and archaics with  
225 causes beyond single lineage-specific variants. We leveraged an approach we recently developed  
226 for predicting gene regulatory differences between modern and archaic individuals from  
227 combinations of genetic variants (Colbran et al. 2019). The approach uses PrediXcan, an elastic  
228 net regression method, to impute gene transcript levels in specific tissues from genetic variation.  
229 Previous work demonstrated that this approach has a modest decrease in performance when  
230 applied to Neanderthals, but that it can accurately applied between humans and Neanderthals for  
231 thousands of genes. Here, we quantify differences in predicted regulation of the 246 circadian  
232 genes between 2,504 humans in the 1000 Genomes Project (1KGP) and three archaic hominins  
233 (the Altai Neanderthal, the Vindija Neanderthal, and the Altai Denisovan). The predicted  
234 regulation values are normalized to the distribution in the training set from the Genotype Tissue  
235 Expression Atlas (GTEx).

236

237

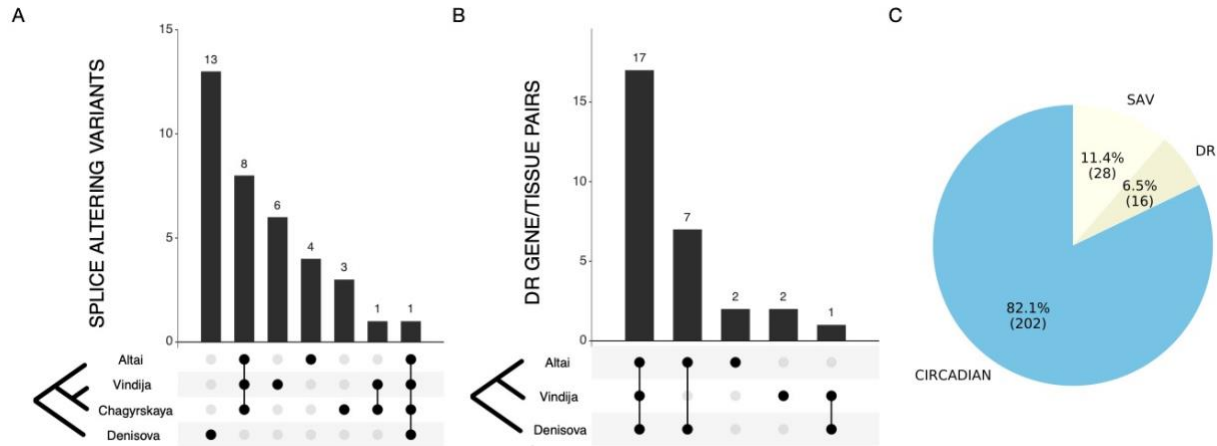

238  
239 **Figure 3. Many circadian genes have evidence of alternative splicing and divergent**  
240 **regulation between modern and archaic hominins. A)** The sharing across archaic individuals  
241 of the 28 predicted archaic-specific splice-altering variants (SAV) in circadian genes. Most were  
242 specific to either the Denisovan or Neanderthal lineage (Table S3). **B)** The sharing of predicted  
243 divergently regulated (DR) gene/tissue pairs across three archaic individuals. (Predictions were  
244 not available for the Chagyrskaya Neanderthal.) Seventeen divergently regulated gene/tissue  
245 pairs were present in all three archaics (representing 16 unique genes). Additionally, 7  
246 gene/tissue DR pairs are shared between the Altai Neanderthal and the Denisovan individual.  
247 One pair is shared between the Vindija Neanderthal and the Denisovan (Table S4). **C)** The  
248 proportion of circadian genes containing archaic splice-altering variants predicted by SpliceAI  
249 (SAV; 11.4%) or divergently regulated circadian genes predicted by PrediXcan (DR; 6.5%).  
250 Thus, 17.9% of the circadian genes are predicted to contain differences to AMH via these  
251 mechanisms.

252  
253  
254 We first analyzed gene regulation predictions in the core circadian clock genes. Archaic gene  
255 regulation was at the extremes of the human distribution for many core clock genes including  
256 *PER2*, *CRY1*, *NPAS2*, *RORA*, *NR1D1* (Figure 4; Figure S2). For example, the regulation of  
257 *PER2* in the two Neanderthals is lower than 2,491 of the 2,504 (99.48%) modern humans  
258 considered. The Denisovan has a predicted *PER2* regulation that is lower than 2,410 (96.25%).  
259 Expanding to all circadian genes and requiring archaic regulation to be more extreme than all  
260 humans (Methods), we identified 24 circadian genes across 23 tissues with strong divergent  
261 regulation between humans and at least one archaic hominin (Figure 3B; Table S4). For example,  
262 all three archaic individuals' regulation values for *RORA*, a core clock gene, are lower than for  
263 any of the 2,504 modern humans. We found that 16 of these genes (Figure S3; Table S4),  
264 including *RORA*, *MYBBP1A*, and *TIMELESS*, were divergently regulated in all archaic  
265 individuals. This represents 6.5% of all the circadian genes (Figure 3C). Surprisingly, the two  
266 Neanderthals only shared one DR gene not found in the Denisovan, while the Altai Neanderthal  
267 and Denisovan shared seven not found in Vindija (Figure 3B). The Altai and Vindija  
268 Neanderthals represent deeply diverging lineages, and this result suggests that they may have  
269 experienced different patterns of divergence in the regulation of their circadian genes.

270 Given these differences in circadian gene regulation between humans and archaics, we  
271 tested whether circadian genes are more likely to be divergently regulated than other gene sets.  
272 Each archaic individual shows nominal enrichment for divergent regulation of circadian genes,



273 but given the small sample size, the P-values are moderate (Permutation test; Altai: OR=1.21,  
274 P=0.19, Vindija: OR=1.05, P=0.43, Denisovan: OR=1.20, P=0.24). The enrichment was stronger  
275 (~1.2x) in the Altai Neanderthal and Denisovan individual.

276  
277

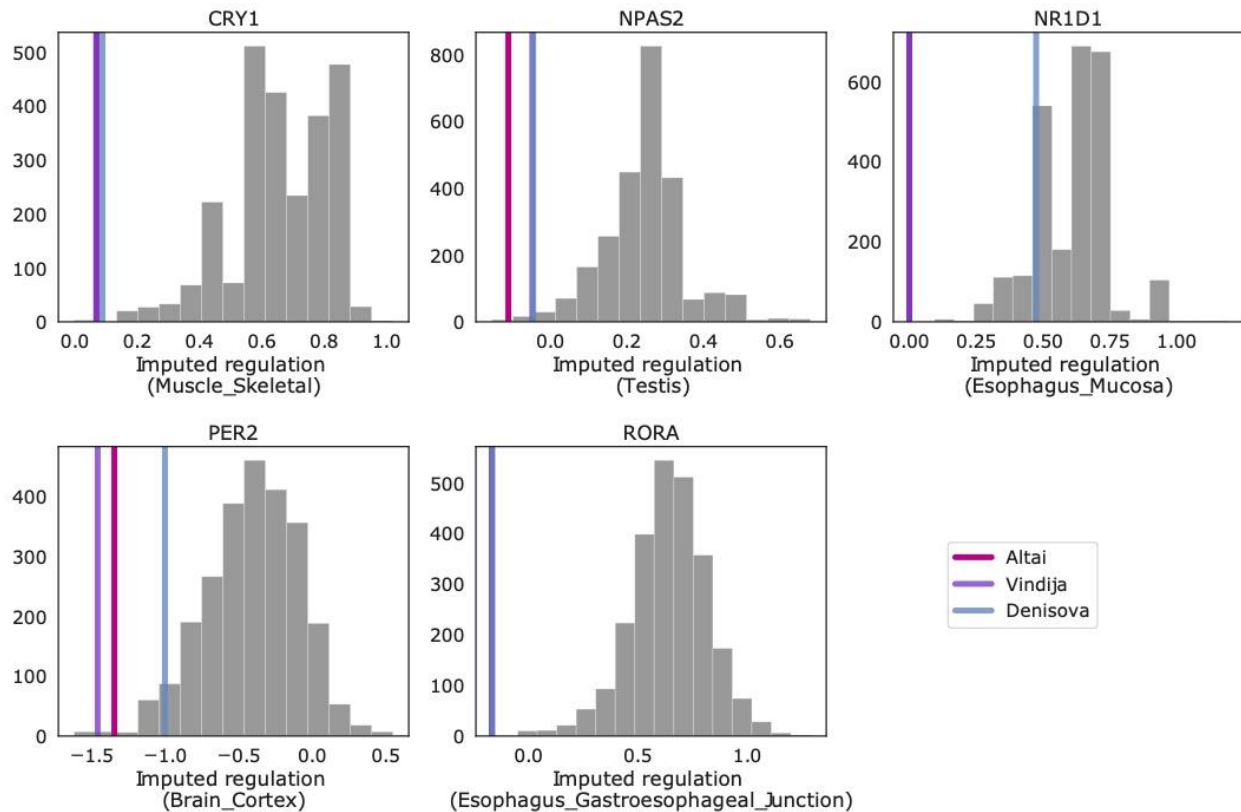

278  
279 **Figure 4. Many circadian genes are divergently regulated between modern humans and**  
280 **archaic hominins.** Comparison of the imputed regulation of core circadian genes between 2504  
281 humans in 1000 Genomes Phase 3 (gray bars) and three archaic individuals (vertical lines). For  
282 each core circadian gene, the tissue with the lowest average P-value for archaic difference from  
283 humans is plotted. Archaic gene regulation is at the extremes of the human distribution for  
284 several core genes: *CRY1*, *PER2*, *NPAS2*, *NR1D1*, *RORA*. See Figure S2 for all core clock genes  
285 and Figure S3 for all divergently regulated circadian genes.

286  
287

### 288 **Did introgressed archaic variants influence modern human circadian biology?**

289 The previous sections demonstrate lineage-specific variation in many genes essential to the  
290 function of the core circadian clock and related pathways. Given this evidence of functional  
291 differences between archaic hominins and AMH in these systems, we next evaluated the  
292 influence of archaic introgression on AMH circadian biology.

293

### 294 **Introgressed variants are enriched in circadian gene eQTL**

295 Given the differences between archaic and modern sequences of circadian genes and their  
296 regulatory elements, we investigated whether Neanderthal introgression contributed functional  
297 circadian variants to modern Eurasian populations. We considered a set of 863,539 variants with

298 evidence being introgressed from archaic hominins to AMH (Browning et al. 2018). These  
299 variants were identified using the S\* algorithm, which searches for regions containing a high  
300 density of alleles in common with Neanderthals and not present or at very low frequency in  
301 Africans.

302 We identified 3,857 introgressed variants associated with the regulation of circadian  
303 genes in modern non-Africans; i.e., they are eQTL for circadian genes in at least one of the  
304 tissues in GTEx (Table S5). The genes *PTPRJ*, *HTR1B*, *NR1D2*, *CLOCK*, and *ATOH7* had the  
305 most eQTL (304, 273, 262, 256, and 252 respectively). The tissues artery tibial, cells cultured  
306 fibroblasts, skin sun exposed lower leg, adipose subcutaneous, and thyroid had the most eQTL  
307 (1361, 962, 876, 871, 716, respectively); though, these patterns are driven in large part by  
308 different power between tissues. Notably, several of these circadian genes (e.g., *NR1D2* and  
309 *CLOCK*) with introgressed eQTL were also found to be divergently regulated in our previous  
310 analyses. This indicates that some of the archaic-derived variants that drove divergent regulation  
311 were retained after introgression and continue to influence circadian regulation in modern  
312 humans.

313 Introgressed variants are significantly more likely to be eQTL for circadian genes than  
314 expected by chance (Figure 5A; Fisher's exact test: OR=1.45, P=9.71e-101). Examining these  
315 associations in each tissue, we found that introgressed eQTL showed significant enrichment for  
316 circadian genes in most tissues (34 of 49; Figure 5B; Table S6) and trended this way in all but  
317 five. Again, the differences between tissues likely influenced by differential power. These results  
318 suggest that the circadian pressures were widespread across tissues. Given the previously  
319 observed depletion for introgressed variants in regulatory elements and eQTL (Petr et al. 2019;  
320 Rinker et al. 2020; Telis, Aguilar, and Harris 2020), this enrichment for circadian genes among  
321 introgressed eQTL is surprising and suggests that the archaic circadian alleles could have been  
322 beneficial after introgression.

323  
324

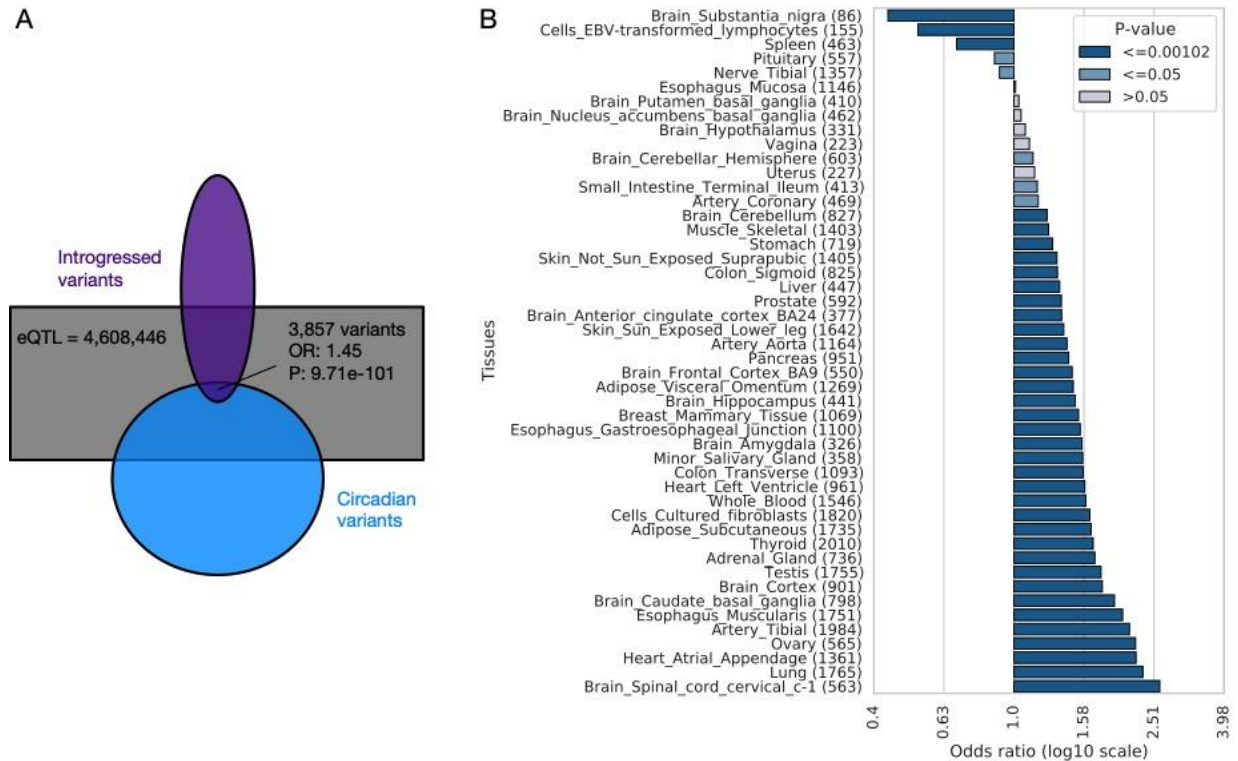

325  
326 **Figure 5. Circadian genes are enriched for introgressed eQTL.** **A)** Archaic introgressed  
327 variants are more likely to be eQTL for circadian genes in GTEx than for non-circadian genes  
328 (Fisher's exact test: OR=1.45, P=9.71e-101). Purple represents the set of introgressed variants;  
329 blue represents the set of circadian variants; 3,857 are introgressed eQTL in circadian genes. The  
330 overlaps are not to scale. **B)** The enrichment for circadian genes among the targets of  
331 introgressed eQTLs in each GTEx tissue. Introgressed eQTL in most tissues show significant  
332 enrichment for circadian genes (Fisher's exact test; Table S6). Kidney cortex did not have any  
333 circadian introgressed eQTLs and thus is not shown. Numbers inside the parenthesis indicate the  
334 count of variants in each tissue. Gray bars indicate lack of statistical significance; light blue bars  
335 indicated nominal significance ( $p \leq 0.05$ ); and dark blue bars indicate significance at the 0.05  
336 level after Bonferroni multiple testing correction ( $p \leq 0.00102$ ).

337  
338

### 339 **Introgressed variants predominantly increase propensity for morningness**

340 After observing that circadian gene expression is influenced by archaic variants, we evaluated  
341 whether these effects are likely to result in a change in organism-level phenotype. To do this, we  
342 evaluated evidence that introgressed variants influence chronotype. The heritability of  
343 chronotype has been estimated in a range from 12 to 38% (Lane et al. 2016; Jones et al. 2019;  
344 2016). Previous studies have identified individual introgressed loci associated with chronotype  
345 (Dannemann and Kelso 2017). We recently found modest enrichment for heritability of  
346 chronotype (morning/evening person phenotype in a GWAS of the UK Biobank) among  
347 introgressed variants genome-wide using stratified LD score regression (heritability enrichment:  
348 1.58, P=0.25) and a suggestive bias toward increasing morningness (McArthur, Rinker, and  
349 Capra 2021).

350 To test comprehensively for a directional effect, we calculated the cumulative fraction of  
351 introgressed loci associated with chronotype in the UK Biobank that increase morningness (after  
352 clumping based on LD at  $R^2=0.9$  in CEU). Each of the nine introgressed loci most strongly  
353 associated with chronotype increase propensity for morningness (Figure 6; Table S7; Table S8; 9  
354 loci,  $P<=1.35e-13$ ). As the strength of the association with morningness decreases, the bias  
355 begins to decrease, but the effect is maintained well past the genome-wide significance threshold  
356 ( $P<5e-8$ ). When focusing the analysis on introgressed variants in proximity ( $<1$  Mb) to circadian  
357 genes, the pattern becomes even stronger. The bias toward morningness remains above 80% at  
358 the genome-wide significance threshold. This suggests that introgressed variants act in a  
359 consistent direction on chronotype, especially when they influence circadian genes.  
360  
361

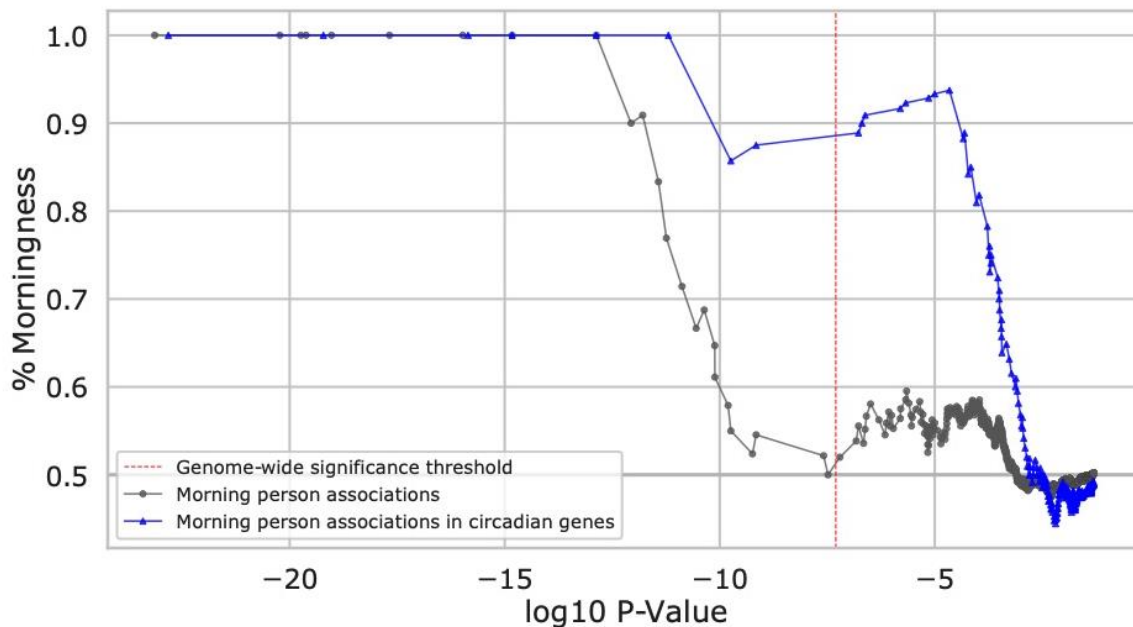

362  
363 **Figure 6. Introgressed variants associate with increased morningness.** The cumulative  
364 fraction of introgressed loci significantly associated with the morning vs. evening person trait in  
365 the UK Biobank that increase morningness (y-axis) at a given p-value threshold (x-axis).  
366 Introgressed loci associated with chronotype are strongly biased towards increasing  
367 morningness, and this effect is strongest at the most strongly associated loci. Introgressed  
368 variants nearby ( $<1$  Mb) circadian genes (blue) are even more strongly biased towards increasing  
369 morningness than introgressed variants overall (gray). Each dot (triangle) represents an  
370 associated locus; variants were clumped by LD for each set ( $R^2=0.9$  CEU).  
371  
372

373 Circadian rhythms are involved in a wide variety of biological systems. To explore other  
374 phenotypes potentially influenced by the introgressed circadian variants, we evaluated evidence  
375 for pleiotropic associations. First, we retrieved all the genome-wide associations reported for  
376 introgressed variants in the Open Targets Genetics (<https://genetics.opentargets.org>) database,  
377 which combines GWAS data from the GWAS Catalog, UK Biobank, and several other sources.  
378 Introgressed circadian variants are associated with traits from a diverse range of categories  
379 (Table S9). Associations with blood related traits are by far the most common; however, this is

380 likely because they have more power in the UK Biobank. Overall, circadian introgressed variants  
381 are significantly more likely to have at least one trait association than introgressed variants not in  
382 the circadian set (Fisher's exact test: OR=1.25, P=7.03e-25) (Figure S4A). The circadian variants  
383 also associate with significantly more traits per variant than the non-circadian set (Mann-  
384 Whitney U: P=9.93e-14) (Figure S4B; Table S10). These results suggest effects for introgressed  
385 circadian variants beyond chronotype.

386

### 387 **Evidence for adaptive introgression at circadian loci**

388 The gene flow from Eurasian archaic hominins into AMH played a role in adaptations to some of  
389 the new environmental conditions encountered outside of Africa (Racimo et al. 2015). The above  
390 analyses demonstrate the effects of introgressed variants on circadian gene regulation and  
391 chronotype. To explore whether these circadian regions show evidence of adaptive introgression,  
392 we considered two sets of introgressed regions predicted to have contributed to AMH adaptation  
393 by two recent machine learning algorithms: *genomatnn* (Gower et al. 2021) and *MaLAdapt* (X.  
394 Zhang et al. 2023). We intersected the circadian introgressed variants with the adaptive  
395 introgression regions from each method.

396 We identified 26 regions in or near circadian genes with evidence of adaptive  
397 introgression—seven from *genomatnn* and 19 from *MaLAdapt* (including 53 and 116 SNPs,  
398 respectively; Table S11). One of these adaptive introgression regions overlaps the upstream  
399 region of the gene *PER2*, a core clock gene involved in the generation of circadian rhythms  
400 through feedback loops. This gene is also predicted to have lower gene regulation in archaics  
401 hominins than most humans. We also found several introgressed eQTL for *PER2*, though they do  
402 not overlap the predicted adaptive introgression region. At the phenotype level, *PER2*  
403 introgressed variants have been associated with having an effect on morning/evening preference  
404 in humans in the UK Biobank. The Vindija Neanderthal also carries a lineage-specific variant in  
405 this gene that has splice-altering effects; this suggests that *PER2* may have experienced multiple  
406 functional changes in different modern and archaic lineages, with potential adaptive effects.

407 Another region with evidence of adaptive introgression overlaps the circadian variants in  
408 the gene *MYBBP1A*. In mouse, *MYBBP1A* acts as co-repressor of *PER2* by binding to its  
409 promoter in combination with Cryptochrome-1 (*CRY1*). *MYBBP1A* is predicted to be  
410 divergently regulated between AMH and archaic hominins, with decreased expression in the  
411 archaics, and it also contains introgressed variants that are circadian eQTLs.

412

413

414

## 415 **DISCUSSION**

416

417 The Eurasian environments where Neanderthals and Denisovans lived for several hundred  
418 thousand years are located at higher latitudes with more variable photoperiods than the landscape  
419 where AMH evolved before leaving Africa. Evaluating genetic variation that arose separately in  
420 each of the archaic and AMH lineages after their split ~700 MYA, we identified lineage-specific  
421 genetic variation in circadian genes, their promoters, and flanking distal regulatory elements. We  
422 found that both archaic- and human-specific variants are observed more often than expected in  
423 each class of functional region. This result suggests that, while each group evolved separately  
424 during hundreds of thousands of years in divergent environments, both experienced pressure on  
425 circadian related variation. Leveraging sequence-based machine learning methods, we identified



426 many archaic-specific variants likely to influence circadian gene splicing and regulation. For  
427 example, core clock genes (*CLOCK*, *PER2*, *RORB*, *RORC*, and *FBXL13*) have archaic variants  
428 predicted to cause alternative splicing compared to AMH. Several core genes were also predicted  
429 in archaics to be at the extremes of human gene regulation, including *PER2*, *CRY1*, *NPAS2*,  
430 *RORA*, *NR1D1*. Surprisingly, the Altai Neanderthal shared more divergent regulation in the  
431 circadian genes with the Denisovan individual than the Vindija Neanderthals. The two  
432 Neanderthals represent populations that were quite distantly diverged with substantially different  
433 histories and geographical ranges. The Denisovan and Altai Neanderthal also come from the  
434 same region in Siberia, while the Vindija Neanderthal came from a region in Croatia with  
435 slightly lower latitude.

436 Introgression introduced variation that first appeared in the archaic hominin lineage into  
437 Eurasian AMH. While most of this genetic variation experienced strong negative selection in  
438 AMH, a smaller portion is thought to have provided adaptive benefits in the new environments  
439 (Racimo et al. 2015). Given the divergence in many circadian genes' regulation, we explored the  
440 landscape of introgression on circadian genes. We first looked at introgressed circadian variants  
441 that are likely to influence gene regulation in AMH. Variants in this set are observed more often  
442 than expected, suggesting the importance of maintaining circadian variation in the population.

443 We then evaluated the association of these introgressed variants with variation in  
444 circadian phenotypes of Eurasians. We previously reported a modest enrichment among  
445 introgressed variants for heritability of the morning/evening person phenotype. Here we further  
446 discovered a consistent directional effect of the introgressed circadian variants on chronotype.  
447 The strongest associated variants increase the probability of being a morning person in  
448 Eurasians.

449 While it is not immediately clear why increased morningness would be beneficial at  
450 higher latitudes, considering this directional effect in the context of clock gene regulation and the  
451 challenge of adaptation to higher latitudes suggests an answer. In present day humans, behavioral  
452 morningness is correlated with shortened period of the circadian molecular clockworks in  
453 individuals. This earlier alignment of sleep/wake with external timing cues is a consequence of a  
454 quickened pace of the circadian gene network (Brown et al. 2008). Therefore, the morningness  
455 directionality of introgressed circadian variants may indicate selection toward shortened  
456 circadian period in the archaic populations living at high latitudes. Supporting this interpretation,  
457 shortened circadian periods are required for synchronization to the extended summer  
458 photoperiods of high latitudes in *Drosophila*, and selection for shorter periods has resulted in  
459 latitudinal clines of decreasing period with increasing latitude, as well as earlier alignment of  
460 behavioral rhythms (Hut et al. 2013). In addition, *Drosophila* populations exhibit decreased  
461 amplitude of behavioral rhythms at higher latitudes which is also thought to aid in  
462 synchronization to long photoperiods (Hut et al. 2013).

463 Our finding that introgressed circadian variants generally decrease gene regulation of  
464 circadian genes suggests that they could lead to lower amplitude clock gene oscillations.  
465 However, when assayed in present day humans there is not a strong correlation between the  
466 overall expression level of *NR1D1* and the transcriptional amplitudes of other clock genes within  
467 individuals (Brown et al. 2008), and quantitative modeling of the mammalian circadian  
468 clockworks suggests that stable clock gene rhythms can result across a wide range of absolute  
469 levels of gene expression as long as the stoichiometric ratios of key positive and negative clock  
470 genes are reasonably conserved (Kim and Forger 2012). Interestingly, lower transcriptional



471 amplitude of *NR1D1* does confer greater sensitivity of the present-day human clockworks to  
472 resetting stimuli, a potentially adaptive characteristic for high latitudes (Brown et al. 2008).

473 Thus, given the studies of latitudinal clines and adaptation from *Drosophila* and the  
474 nascent understanding of clock gene contributions to behavioral phenotypes in present day  
475 humans, the directional effects of introgressed circadian gene variants toward early chronotype  
476 and decreased gene regulation we observed can be viewed as potentially adaptive. More  
477 complex chronotype phenotyping and mechanistic studies of the variants of interest are needed  
478 to fully understand these observations.

479 Finally, to explore evidence for positive selection on introgressed variants in AMH, we  
480 analyzed results from two recent methods for detecting adaptive introgression: *genomatnn* and  
481 *MaLAdapt*. Both methods identified circadian loci as candidates for adaptive introgression.  
482 However, we note that the predictions of these two methods have only modest overlap with one  
483 another, underscoring the difficulty of identifying adaptive introgression.

484 Several limitations must be considered when interpreting our results. First, multiple sets  
485 of predictions of introgressed variants are available. While these sets are qualitatively similar in  
486 their genomic attributes, additional introgressed circadian variants could be discovered by  
487 including other lines of evidence for introgression. Second, it is challenging to quantify the  
488 complexity of traits with a large behavioral component (like chronotype) and infer their variation  
489 from genomic information alone. Nevertheless, we believe our approach of focusing on  
490 molecular aspects (splicing, gene regulation) of genomic loci with relevance to circadian  
491 biology, in parallel to GWAS-based associations, lends additional support to the divergence in  
492 chronotype between archaic hominins and modern humans. Third, we also note that circadian  
493 rhythms contribute to many biological systems, so the variants in these genes tend to be  
494 associated with a variety of phenotypes. Thus, there is also the potential that selection acted on  
495 other phenotypes influenced by circadian variation than those related directly to chronotype.  
496 Fourth, recent adaptive evolution is challenging to identify, and this is especially challenging for  
497 introgressed loci. Nonetheless, we find several circadian loci with evidence of adaptive  
498 introgression from each of the scans we considered. Finally, given the many environmental  
499 factors that differed between African and non-African environments, it is difficult to definitively  
500 determine whether selection on a particular locus was the result of variation in light levels vs.  
501 other related factors, such as temperature. Nonetheless, given the observed modern associations  
502 with chronotype for many of these variants, we believe it is the most plausible target.

503 In conclusion, studying how humans evolved in the face of changing environmental  
504 pressures is necessary to understanding variation in present-day phenotypes and the potential  
505 tradeoffs that influence propensity to different diseases in modern environments (Benton et al.  
506 2021). Here, we show that genomic regions involved in circadian biology exhibited substantial  
507 functional divergence between separate hominin populations. Furthermore, we show that  
508 introgressed variants contribute to variation in AMH circadian phenotypes today in ways that are  
509 consistent with an adaptive benefit.

510

511

512

## 513 **METHODS**

514

### 515 **Circadian gene selection**

516 Circadian biology is a complex system due to its high importance in the functioning of biological  
517 timing in diverse biological systems. For that reason, determining which genes are crucial for  
518 selection to environment response related to light exposure is not a straight forward process. To  
519 address this issue, we look at different sources of genome annotation databases and searched for  
520 genes and variants associated with circadian related phenotypes. We considered all human  
521 protein-coding genes in the Gene Ontology database annotated with the GO:0007623 ("circadian  
522 rhythm") term or terms annotated with relationship "is\_a", "part\_of", "occurs\_in", or "regulates"  
523 circadian rhythm. We also considered genes containing experimental or orthologous evidence of  
524 circadian function in the Circadian Gene Database (CGDB), the GWAS Catalog genes  
525 containing "chronotype" or "circadian rhythm" associated variants, and a curated set of genes  
526 available in WikiPathways [<https://www.wikipathways.org/index.php/Pathway:WP3594>,  
527 <https://doi.org/10.1093/nar/gkaa1024>]. The final set of circadian genes was curated by Dr.  
528 Douglas McMahon.

529 To select the candidate circadian genes with the highest confidence, we defined a  
530 hierarchy system where genes annotated by McMahon or annotated in 3 out of 4 other sources  
531 receive a "High" level of confidence. Genes with evidence from 2 out of 4 of the sources are  
532 assigned a "Medium" level of confidence. Genes annotated as circadian only in 1 out of 4  
533 sources are assigned to Low confidence and not considered in our circadian gene set. We then  
534 defined our set of circadian variants from the 1000 Genomes Project using the official list of  
535 circadian genes. The variants are included in analysis of coding, non-coding, regulatory, eQTL,  
536 human-specific, archaic-specific, and introgressed variants.

537

### 538 **Definition of lineage-specific variants**

539 To identify candidate variants that are specific to the human and the archaic lineages, we used a  
540 set of variants published by Kuhlwilm and Boeckx (Kuhlwilm and Boeckx 2019)  
541 (<https://doi.org/10.1038/s41598-019-44877-x>). The variants were extracted from the high-  
542 coverage genotypes of three archaics: a 122,000-year-old Neanderthal from the Altai Mountains  
543 (52x coverage), a 52,000-year-old Neanderthal from Vindija in Croatia (30x coverage), and a  
544 72,000-year-old Denisovan from the Altai Mountains (30x coverage). The total variant sites  
545 retrieved from this set is 4,437,803. We used a filtering method similar to the one proposed in  
546 this publication. That is, a human-specific is defined as a position where all the humans carry the  
547 derived allele and all the archaics carry the ancestral allele. An archaic-specific is defined as a  
548 position where all the archaics carry the derived allele and the human allele frequency is not  
549 greater than 0.00001 ( $1e-5$ ). These filters resulted in 9,424 human specific and 33,184 archaic-  
550 specific variants.

551

### 552 **Enrichment of lineage-specific variants among functional regions of the genome**

553 We intersected the sets of lineage-specific variants with several sets of annotated functional  
554 genomic regions. Inside circadian gene regions (Gencode v29), we found 156 human-specific  
555 variants and 341 archaic-specific variants. In circadian promoter regions, we found 6 human-  
556 specific variants and 19 archaic-specific variants. Promoters were defined as regions 5 kb up- to  
557 1 kb downstream from a transcription start site. In distal regulatory elements, we found 247  
558 human-specific variants and 807 archaic-specific variants. For this last set, we considered  
559 candidate cis-regulatory elements (cCREs) published by ENCODE (Moore et al. 2020) within 1  
560 Mb of the circadian genes.

561 To compute whether lineage-specific variants are more abundant than expected in  
562 circadian genes, we applied a Fisher's exact test to the sets of human- and archaic-specific  
563 variants in regulatory, promoter, and gene regions. Human and archaic-specific variants are  
564 significantly enriched in both regulatory (Human: OR=1.25, P=8.39e-4; Archaic: OR=1.16,  
565 P=6.15e-5) and gene (Human: OR=1.84, P=7.06e-12; Archaic: OR=1.13, P=0.023) regions. The  
566 enrichment observed in the promoters of both lineages is not supported by a significant p-value  
567 (Human: OR=1.21, P=0.65; Archaic: OR=1.09, P=0.63).

568

### 569 **Genes containing archaic variants with evidence of alternative splicing**

570 We used a set of archaic variants annotated with the splice altering probabilities to identify  
571 circadian genes that may be differentially spliced between archaic hominins and AMH (Brand,  
572 Colbran, and Capra 2022). We considered variants from four archaic individuals: the Altai,  
573 Chagyrskaya, and Vindija Neanderthals and the Altai Denisovan. These archaic variants were  
574 annotated using SpliceAI (Jaganathan et al. 2019) and we considered any variant with a  
575 maximum delta, or splice altering probability, > 0.2. We identified 36 archaic-specific splice  
576 altering variants, defined as those variants absent from 1KGP, among 28 circadian genes. Next,  
577 we tested for enrichment among this gene set using an empirical null approach (Brand, Colbran,  
578 and Capra 2022; McArthur et al. 2022). We shuffled the maximum deltas among 1,607,350  
579 variants 10,000 times and counted the number of circadian genes with a splice altering variant  
580 each iteration. Enrichment was calculated as the number of observed genes (N = 28) divided by  
581 the mean gene count among 10,000 shuffles. In addition to all genes with archaic-specific  
582 variants, we considered six other subsets among these variants: 1) genes with variants private to  
583 the Altai Neanderthal, 2) genes with variants private to the Chagyrskaya Neanderthal, 3) genes  
584 with variants private to the Altai Denisovan, 4) genes with variants private to all Neanderthals, 5)  
585 genes with variants shared among all archaic individuals, and 6) genes with variants private to  
586 the Vindija Neanderthal. Finally, we considered a subset of splice altering variants that were  
587 identified as tag SNPs by Vernot et al. (Vernot et al. 2016).

588

### 589 **PrediXcan**

590 To understand the difference in circadian biology between present-day humans and archaic  
591 hominins, we analyzed predictions on gene regulation. We considered the results from  
592 PrediXcan gene regulation predictions across 44 tissues from the PredictDB Data Repository  
593 (<http://predictdb.org/>). The models were trained on GTEx V6 using variants identified in 2,504  
594 present-day humans in the 1000 Genomes Project (1KGP) phase 3 within 1 Mb of each circadian  
595 gene. The original analysis includes predictions for 17,748 genes for which the models explained  
596 a significant amount of variance in gene expression in each tissue (FDR < 0.05). The prediction  
597 models were also applied to the Altai and Vindija Neanderthals and the Denisovan. The resulting  
598 predictions are normalized values of the distribution observed in GTEx individuals used to train  
599 the original prediction models. Each prediction contains an empirical P-value which was  
600 calculated for each gene and tissue pair to define genes that are divergently regulated between  
601 archaic hominins and humans. The P-value is obtained by calculating the proportion of humans  
602 from the 1KGP that have predictions more extreme compared to the human median than the  
603 archaic individual. Significantly DR genes are defined as those where the archaic prediction falls  
604 outside the distribution of humans in the 1KGP predictions.

605 We tested whether the circadian genes in our set are more likely to be DR compared to an  
606 empirical null distribution from random gene sets of the same size. We account for the fact that

607 some genes are modeled in more tissues than others by matching the distribution of tissues in  
608 which each gene could be modeled in the random sets to our set. Among 1,467 DR genes in the  
609 Altai Neanderthal we find 23 DR circadian genes out of the total 236 genes in the circadian set.  
610 We iterate through the permutation analysis 1,000,000 times and find an enrichment of 1.21  
611 ( $P=0.19$ ). A similar analysis is done in the Vindija Neanderthal (1,536 total DR, 21 circadian  
612 DR, enrichment of 1.05,  $P=0.43$ ) and the Denisovan individual (1,214 total DR, 19 circadian DR,  
613 enrichment of 1.20,  $P=0.24$ ). In this study, we define a set of DR genes as the intersection  
614 between DR genes in all three archaics, resulting in a set of 16 genes.

615

### 616 **Enrichment of introgressed variants in eQTL**

617 We performed an enrichment analysis using Pearson's chi-squared test to evaluate if there is  
618 overrepresentation of introgressed alleles in our set of circadian variants using the GTEx dataset.  
619 We did a liftOver of the GTEx v8 dataset from hg38 to hg19. The original hg38 set contains  
620 4,631,659 eQTLs across 49 tissues. After the LiftOver, 4,608,446 eQTLs remained, with the rest  
621 not mapping. We used the archaic introgressed variants dataset from Browning 2018. The set  
622 contains 863,539 variants that are introgressed in humans originating in archaic hominins. We  
623 performed an intersection between the set of genes containing evidence for eQTLs and our set of  
624 246 circadian genes to retrieve a subset of variant sites with evidence of being eQTL in circadian  
625 genes. The resulting subset contained 97,441 circadian eQTLs in 49 tissues and 239 genes. We  
626 further intersected the introgressed variants and the set of eQTL, resulting in 128,138  
627 introgressed eQTLs. The final set of eQTLs that are circadian and also introgressed is 3,857.

628

### 629 **Direction of effect of chronotype associations**

630 To explore the effect of archaic introgression in circadian dreams on human chronotype, we  
631 quantified the direction of effect of variants associated to a Morning/Evening person trait in a  
632 GWAS analysis of the UK Biobank (<http://www.nealelab.is/uk-biobank/>). The variants were LD  
633 clumped using PLINK v1.9 ( $R^2$  0.9). We generated cumulative proportion values on the beta  
634 values assigned to each associated variant on an ascending order of P-values.

635

### 636 **Detection of pleiotropy in the set of introgressed circadian variants**

637 To understand the extent of different phenotypes associated with the introgressed circadian  
638 variants, we first extracted genome-wide associations from Open Targets Genetics  
639 (<https://genetics.opentargets.org/>) for each of the variants with evidence of introgression  
640 (Browning et al. 2018). Only the variants with significant p-values were analyzed. The p-value  
641 threshold was set at the genome-wide significance level ( $P=5e-8$ ). We split the variants in two  
642 sets: introgressed circadian and introgressed non-circadian. Many of these variants are not  
643 associated with any phenotype. We performed a Fisher's exact test to analyze which of the two  
644 sets contains a higher ratio of SNPs with at least one association versus SNPs with no  
645 association. The result showed that the circadian set had a significantly higher ratio ( $OR=1.36$ ,  
646  $P=5e-29$ ). Then we calculated the total of unique traits associated with each of the variants, given  
647 that the SNP has at least one association. We used a Mann-Whitney U test to understand which  
648 set is represented by a higher level of traits per SNP. The circadian set was slightly more  
649 pleiotropic, and the result is supported by a significant p-value ( $P=5.4e-3$ ).

650

### 651 **Identifying introgressed circadian variants with evidence of adaptive introgression**

652 We sought out to identify circadian variants that contain evidence of adaptive introgression (AI).  
653 To achieve this, we collected two sets of genomic regions that were measured for their likelihood  
654 to be under AI by two machine learning methods: *genomatnn* and *MaLAdapt*. *genomatnn* is a  
655 convolutional neural network trained to identify adaptive introgression based on simulations  
656 (Gower et al. 2021). *MaLAdapt* is a machine learning algorithm trained to find adaptive  
657 introgression based on simulations using an extra-trees classifier (ETC) (X. Zhang et al. 2023).  
658 Following the thresholds used in each paper, a region is considered to be under AI if the  
659 prediction value assigned to it meets a threshold of 0.5 or 0.9, respectively. Because the two  
660 methods are different, we performed two separate analyses instead of integrating them. To find  
661 the variants that fall into AI regions, we intersected the set of introgressed circadian SNPs with  
662 the *genomatnn* and the *MaLAdapt* regions individually. The set of introgressed circadian variants  
663 contains variants inside circadian genes, in circadian promoter regions (5 kb up- and 1 kb  
664 downstream of the TSS), and variants with regulatory function (cCREs) flanking circadian genes  
665 by 1 Mb. We found 53 introgressed circadian variants in 7 genes defined as AI by *genomatnn*,  
666 and 116 variants in 19 genes defined as AI by *MaLAdapt*.

667  
668

#### 669 DATA AVAILABILITY

670 The data underlying this article are available in the article and in its online supplementary  
671 material.

672  
673

#### 674 DECLARATION OF INTERESTS

675 The authors declare that they have no competing interests.

676  
677

#### 678 ACKNOWLEDGMENTS

679 We thank members of the Capra Lab for helpful comments on this work. This work was  
680 conducted in part using the resources of the Advanced Computing Center for Research and  
681 Education at Vanderbilt University, Nashville, TN. This work was supported by the National  
682 Institutes of Health [R35GM127087 to JAC, R01GM117650 to DM, F30HG011200 to EM,  
683 T32GM080178 to Vanderbilt University (EM), and T32HG009495 to the University of  
684 Pennsylvania (LLC)].

685  
686

#### 687 AUTHOR CONTRIBUTIONS

688 Conceptualization: KV, JAC; Methodology: KV, LC, EM, CB, JS, DM, JAC; Investigation: KV,  
689 LC, EM, CB, JAC; Writing – Original Draft: KV, JAC; Writing – Review & Editing: KV, LC,  
690 EM, CB, DR, DM, JAC; Funding Acquisition: JAC; Resources: JAC; Supervision: JAC.

691  
692

#### 693 REFERENCES

694 Arnold, Lee J., Martina Demuro, Josep M. Parés, Juan Luis Arsuaga, Arantza Aranburu, José  
695 María Bermúdez de Castro, and Eudald Carbonell. 2014. “Luminescence Dating and  
696 Palaeomagnetic Age Constraint on Hominins from Sima de Los Huesos, Atapuerca, Spain.”  
697 *Journal of Human Evolution* 67 (1): 85–107. <https://doi.org/10.1016/j.jhevol.2013.12.001>.



- 698 Bae, Christopher J., Katerina Douka, and Michael D. Petraglia. 2017. “On the Origin of Modern  
699 Humans: Asian Perspectives.” *Science* 358 (6368). <https://doi.org/10.1126/science.aai9067>.
- 700 Benton, Mary Lauren, Abin Abraham, Abigail L. LaBella, Patrick Abbot, Antonis Rokas, and  
701 John A. Capra. 2021. “The Influence of Evolutionary History on Human Health and  
702 Disease.” *Nature Reviews Genetics*. Nature Research. <https://doi.org/10.1038/s41576-020-00305-9>.
- 703
- 704 Brand, Colin M, Laura L Colbran, and John A Capra. 2022. “Resurrecting the Alternative  
705 Splicing Landscape of Archaic Hominins Using Machine Learning.” *BioRxiv*.
- 706 Brown, Steven A., Dieter Kunz, Amelie Dumas, Pål O. Westermark, Katja Vanselow, Amely  
707 Tilmann-Wahnschaffe, Hanspeter Herzel, and Achim Kramer. 2008. “Molecular Insights  
708 into Human Daily Behavior.” *Proceedings of the National Academy of Sciences of the*  
709 *United States of America* 105 (5): 1602–7. <https://doi.org/10.1073/pnas.0707772105>.
- 710 Browning, Sharon R., Brian L. Browning, Ying Zhou, Serena Tucci, and Joshua M. Akey. 2018.  
711 “Analysis of Human Sequence Data Reveals Two Pulses of Archaic Denisovan  
712 Admixture.” *Cell* 173 (1): 53–61. <https://doi.org/https://doi.org/10.1016/j.cell.2018.02.031>.
- 713 Colbran, Laura L., Eric R. Gamazon, Dan Zhou, Patrick Evans, Nancy J. Cox, and John A.  
714 Capra. 2019. “Inferred Divergent Gene Regulation in Archaic Hominins Reveals Potential  
715 Phenotypic Differences.” *Nature Ecology & Evolution* 3 (November): 1598–1606.  
716 <https://doi.org/10.1038/s41559-019-0996-x>.
- 717 Dannemann, Michael, and Janet Kelso. 2017. “The Contribution of Neanderthals to Phenotypic  
718 Variation in Modern Humans.” *American Journal of Human Genetics* 101 (4): 578–589.  
719 <https://doi.org/10.1016/j.ajhg.2017.09.010>.
- 720 Dorokhov, Vladimir B, Alexandra N Puchkova, Anton O Taranov, A Petr, Tatiana V Tupitsina,  
721 Igor D Ivanov, Valentin A Vavilin, et al. 2018. “An Hour in the Morning Is Worth Two in  
722 the Evening: Association of Morning Component of Morningness – Eveningness with  
723 Single Nucleotide Polymorphisms in Circadian Clock Genes.” *Biological Rhythm Research*  
724 49 (4): 622–42. <https://doi.org/10.1080/09291016.2017.1390823>.
- 725 Gan, Yong, Liqing Li, Liangwen Zhang, Shijiao Yan, Chao Gao, Sai Hu, Yan Qiao, Sha Tang,  
726 Chao Wang, and Zuxun Lu. 2018. “Association between Shift Work and Risk of Prostate  
727 Cancer: A Systematic Review and Meta-Analysis of Observational Studies.”  
728 *Carcinogenesis*. <https://doi.org/10.1093/carcin/bgx129>.
- 729 Gan, Yong, Chen Yang, Xinyue Tong, Huilian Sun, Yingjie Cong, Xiaoxu Yin, Liqing Li, et al.  
730 2015. “Shift Work and Diabetes Mellitus: A Meta-Analysis of Observational Studies.”  
731 *Occupational and Environmental Medicine*. <https://doi.org/10.1136/oemed-2014-102150>.
- 732 Gómez-Robles, Aida. 2019. “Dental Evolutionary Rates and Its Implications for the  
733 Neanderthal–Modern Human Divergence.” *Science Advances* 5 (5): eaaw1268.  
734 <https://doi.org/10.1126/sciadv.aaw1268>.
- 735 Gower, Graham, Pablo Iáñez Picazo, Matteo Fumagalli, and Fernando Racimo. 2021. “Detecting  
736 Adaptive Introgression in Human Evolution Using Convolutional Neural Networks.” *ELife*  
737 10 (May). <https://doi.org/10.7554/eLife.64669>.
- 738 Green, Richard E, Johannes Krause, Adrian W Briggs, Tomislav Maricic, Udo Stenzel, Martin  
739 Kircher, Nick Patterson, et al. 2010. “A Draft Sequence of the Neandertal Genome.”  
740 *Science* 328 (5979): 710–22. <https://doi.org/10.1126/science.1188021>.
- 741 Gyarmati, Georgina, Michelle C. Turner, Gemma Castaño-Vinyals, Ana Espinosa, Kyriaki  
742 Papantoniou, Juan Alguacil, Laura Costas, et al. 2016. “Night Shift Work and Stomach  
743 Cancer Risk in the MCC-Spain Study.” *Occupational and Environmental Medicine*.



- 744 <https://doi.org/10.1136/oemed-2016-103597>.
- 745 Hublin, Jean Jacques, Abdelouahed Ben-Ncer, Shara E. Bailey, Sarah E. Freidline, Simon  
746 Neubauer, Matthew M. Skinner, Inga Bergmann, et al. 2017. “New Fossils from Jebel  
747 Irhoud, Morocco and the Pan-African Origin of Homo Sapiens.” *Nature*.  
748 <https://doi.org/10.1038/nature22336>.
- 749 Huerta-Sánchez, Emilia, Xin Jin, Asan, Zhuoma Bianba, Benjamin M. Peter, Nicolas  
750 Vinckenbosch, Yu Liang, et al. 2014. “Altitude Adaptation in Tibetans Caused by  
751 Introgression of Denisovan-like DNA.” *Nature*. <https://doi.org/10.1038/nature13408>.
- 752 Hut, Roelof A., Silvia Paolucci, Roi Dor, Charalambos P. Kyriacou, and Serge Daan. 2013.  
753 “Latitudinal Clines: An Evolutionary View on Biological Rhythms.” *Proceedings of the*  
754 *Royal Society B: Biological Sciences* 280 (1765). <https://doi.org/10.1098/rspb.2013.0433>.
- 755 Jacobs, Guy S., Georgi Hudjashov, Lauri Saag, Pradiptajati Kusuma, Chelzie C. Darusallam,  
756 Daniel J. Lawson, Mayukh Mondal, et al. 2019. “Multiple Deeply Divergent Denisovan  
757 Ancestries in Papuans.” *Cell* 177 (April). <https://doi.org/10.1016/j.cell.2019.02.035>.
- 758 Jaganathan, Kishore, Sofia Kyriazopoulou Panagiotopoulou, Jeremy F. McRae, Siavash Fazel  
759 Darbandi, David Knowles, Yang I. Li, Jack A. Kosmicki, et al. 2019. “Predicting Splicing  
760 from Primary Sequence with Deep Learning.” *Cell* 176 (3): 535-548.e24.  
761 <https://doi.org/10.1016/j.cell.2018.12.015>.
- 762 Jones, Samuel E., Jacqueline M. Lane, Andrew R. Wood, Vincent T. van Hees, Jessica Tyrrell,  
763 Robin N. Beaumont, Aaron R. Jeffries, et al. 2019. “Genome-Wide Association Analyses of  
764 Chronotype in 697,828 Individuals Provides Insights into Circadian Rhythms.” *Nature*  
765 *Communications* 10 (343). <https://doi.org/10.1038/s41467-018-08259-7>.
- 766 Jones, Samuel E., Jessica Tyrrell, Andrew R. Wood, Robin N. Beaumont, Katherine S. Ruth,  
767 Marcus A. Tuke, Hanieh Yaghootkar, et al. 2016. “Genome-Wide Association Analyses in  
768 128,266 Individuals Identifies New Morningness and Sleep Duration Loci.” *PLoS Genetics*  
769 12 (6): e1006125. <https://doi.org/10.1371/journal.pgen.1006125>.
- 770 Kim, Jae Kyoung, and Daniel B. Forger. 2012. “A Mechanism for Robust Circadian  
771 Timekeeping via Stoichiometric Balance.” *Molecular Systems Biology* 8 (1).  
772 <https://doi.org/10.1038/msb.2012.62>.
- 773 Kivelä, Liia, Marinos Rodolfos Papadopoulos, and Niki Antypa. 2018. “Chronotype and  
774 Psychiatric Disorders.” *Current Sleep Medicine Reports* 4 (2): 94–103.  
775 <https://doi.org/10.1007/s40675-018-0113-8>.
- 776 Knutson, Kristen L., and Malcolm von Schantz. 2018. “Associations between Chronotype,  
777 Morbidity and Mortality in the UK Biobank Cohort.” *Chronobiology International* 35 (8):  
778 1045–53. <https://doi.org/10.1080/07420528.2018.1454458>.
- 779 Kuhlwilm, Martin, and Cedric Boeckx. 2019. “A Catalog of Single Nucleotide Changes  
780 Distinguishing Modern Humans from Archaic Hominins.” *Nature Scientific Reports* 9  
781 (8463). <https://doi.org/10.1038/s41598-019-44877-x>.
- 782 Lane, Jacqueline M., Irma Vlasac, Simon G. Anderson, Simon D. Kyle, William G. Dixon,  
783 David A. Bechtold, Shubhroz Gill, et al. 2016. “Genome-Wide Association Analysis  
784 Identifies Novel Loci for Chronotype in 100,420 Individuals from the UK Biobank.” *Nature*  
785 *Communications* 7 (1): 1–10. <https://doi.org/10.1038/ncomms10889>.
- 786 Larcher, Sandra, P. Y. Benhamou, J. L. Pépin, and A. L. Borel. 2015. “Sleep Habits and  
787 Diabetes.” *Diabetes and Metabolism*. <https://doi.org/10.1016/j.diabet.2014.12.004>.
- 788 Larcher, Sandra, Anne Sophie Gauchez, Sandrine Lablanche, Jean Louis Pépin, Pierre Yves  
789 Benhamou, and Anne Laure Borel. 2016. “Impact of Sleep Behavior on Glycemic Control

- 790 in Type 1 Diabetes: The Role of Social Jetlag.” *European Journal of Endocrinology*.  
791 <https://doi.org/10.1530/EJE-16-0188>.
- 792 Leocadio-Miguel, Mario André, Fernando Mazzili Louzada, Leandro Lourenção Duarte, Roberta  
793 Peixoto Areas, Marilene Alam, Marcelo Ventura Freire, John Fontenele-araujo, Luiz  
794 Menna-barreto, and Mario Pedrazzoli. 2017. “Latitudinal Cline of Chronotype.” *Scientific*  
795 *Reports* 7 (5437): 2–7. <https://doi.org/10.1038/s41598-017-05797-w>.
- 796 Lowden, Arne, Nelson Lemos, Bruno Gonçalves, Gülçin Öztürk, Fernando Louzada, Mario  
797 Pedrazzoli, and Claudia Moreno. 2018. “Delayed Sleep in Winter Related to Natural  
798 Daylight Exposure among Arctic Day Workers.” *Clocks & Sleep* 1 (1): 105–16.  
799 <https://doi.org/10.3390/clockssleep1010010>.
- 800 Mafessoni, Fabrizio, Steffi Grote, Cesare De Filippo, Viviane Slon, Kseniya A. Kolobova, Bence  
801 Viola, Sergey V. Markin, et al. 2020. “A High-Coverage Neandertal Genome from  
802 Chagyrskaya Cave.” *Proceedings of the National Academy of Sciences of the United States*  
803 *of America* 117 (26). <https://doi.org/10.1073/pnas.2004944117>.
- 804 McArthur, Evonne, David C. Rinker, and John A. Capra. 2021. “Quantifying the Contribution of  
805 Neanderthal Introgression to the Heritability of Complex Traits.” *Nature Communications*  
806 12 (1): 1–14. <https://doi.org/10.1038/s41467-021-24582-y>.
- 807 McArthur, Evonne, David C. Rinker, Erin N. Gilbertson, Geoff Fudenberg, Maureen Pittman,  
808 Kathleen Keough, Katherine S. Pollard, and John A. Capra. 2022. “Reconstructing the 3D  
809 Genome Organization of Neanderthals Reveals That Chromatin Folding Shaped Phenotypic  
810 and Sequence Divergence.” *BioRxiv*.  
811 [https://www.biorxiv.org/content/10.1101/2022.02.07.479462v1%0Ahttps://www.biorxiv.org](https://www.biorxiv.org/content/10.1101/2022.02.07.479462v1%0Ahttps://www.biorxiv.org/content/10.1101/2022.02.07.479462v1.abstract)  
812 [g/content/10.1101/2022.02.07.479462v1.abstract](https://www.biorxiv.org/content/10.1101/2022.02.07.479462v1.abstract).
- 813 Meyer, Matthias, Juan Luis Arsuaga, Cesare De Filippo, Sarah Nagel, Ayinuer Aximu-Petri,  
814 Birgit Nickel, Ignacio Martínez, et al. 2016. “Nuclear DNA Sequences from the Middle  
815 Pleistocene Sima de Los Huesos Hominins.” *Nature* 531 (7595).  
816 <https://doi.org/10.1038/nature17405>.
- 817 Meyer, Matthias, Qiaomei Fu, Ayinuer Aximu-Petri, Isabelle Glocke, Birgit Nickel, Juan Luis  
818 Arsuaga, Ignacio Martínez, et al. 2014. “A Mitochondrial Genome Sequence of a Hominin  
819 from Sima de Los Huesos.” *Nature* 505 (7483). <https://doi.org/10.1038/nature12788>.
- 820 Meyer, Matthias, Martin Kircher, Marie Theres Gansauge, Heng Li, Fernando Racimo, Swapan  
821 Mallick, Joshua G. Schraiber, et al. 2012. “A High-Coverage Genome Sequence from an  
822 Archaic Denisovan Individual.” *Science*. <https://doi.org/10.1126/science.1224344>.
- 823 Michael, Todd P., Patrice A. Salomé, Hannah J. Yu, Taylor R. Spencer, Emily L. Sharp, Mark A.  
824 McPeck, José M. Alonso, Joseph R. Ecker, and C. Robertson McClung. 2003. “Enhanced  
825 Fitness Conferred by Naturally Occurring Variation in the Circadian Clock.” *Science* 302  
826 (5647): 1049–53. <https://doi.org/10.1126/science.1082971>.
- 827 Moore, Jill E., Michael J. Purcaro, Henry E. Pratt, Charles B. Epstein, Noam Shores, Jessika  
828 Adrian, Trupti Kawli, et al. 2020. *Expanded Encyclopaedias of DNA Elements in the*  
829 *Human and Mouse Genomes*. *Nature*. Vol. 583.  
830 <https://pubmed.ncbi.nlm.nih.gov/32728249/>.
- 831 Nielsen, Rasmus, Joshua M. Akey, Mattias Jakobsson, Jonathan K. Pritchard, Sarah Tishkoff,  
832 and Eske Willerslev. 2017. “Tracing the Peopling of the World through Genomics.” *Nature*  
833 541 (7637): 302–10. <https://doi.org/10.1038/nature21347>.
- 834 O’Malley, Kathleen G., and Michael A. Banks. 2008. “A Latitudinal Cline in the Chinook  
835 Salmon (*Oncorhynchus Tshawytscha*) Clock Gene: Evidence for Selection on PolyQ

- 836 Length Variants.” *Proceedings of the Royal Society B: Biological Sciences* 275 (1653):  
837 2813–21. <https://doi.org/10.1098/rspb.2008.0524>.
- 838 O’Malley, Kathleen G., Michael J. Ford, and Jeffrey J. Hard. 2010. “Clock Polymorphism in  
839 Pacific Salmon: Evidence for Variable Selection along a Latitudinal Gradient.” In  
840 *Proceedings of the Royal Society B: Biological Sciences*, 277:3703–14. Royal Society.  
841 <https://doi.org/10.1098/rspb.2010.0762>.
- 842 Papantoniou, Kyriaki, Gemma Castaño-Vinyals, Ana Espinosa, Nuria Aragonés, Beatriz Pérez-  
843 Gómez, Eva Ardanaz, Jone Miren Altzibar, et al. 2016. “Breast Cancer Risk and Night Shift  
844 Work in a Case–Control Study in a Spanish Population.” *European Journal of*  
845 *Epidemiology*. <https://doi.org/10.1007/s10654-015-0073-y>.
- 846 Papantoniou, Kyriaki, Gemma Castaño-Vinyals, Ana Espinosa, Michelle C. Turner, Maria Henar  
847 Alonso-Aguado, Vicente Martin, Nuria Aragonés, et al. 2017. “Shift Work and Colorectal  
848 Cancer Risk in the MCC-Spain Case–Control Study.” *Scandinavian Journal of Work,*  
849 *Environment and Health*. <https://doi.org/10.5271/sjweh.3626>.
- 850 Petr, Martin, Svante Pääbo, Janet Kelso, and Benjamin Vernot. 2019. “Limits of Long-Term  
851 Selection against Neandertal Introgression.” *Proceedings of the National Academy of*  
852 *Sciences* 116 (5): 1639–1644. <https://doi.org/10.1073/pnas.1814338116>.
- 853 Prüfer, Kay, Cesare De Filippo, Steffi Grote, Fabrizio Mafessoni, Petra Korlević, Mateja  
854 Hajdinjak, Benjamin Vernot, et al. 2017. “A High-Coverage Neandertal Genome from  
855 Vindija Cave in Croatia.” *Science* 358: 655–658. <https://doi.org/10.1126/science.aao1887>.
- 856 Prüfer, Kay, Fernando Racimo, Nick Patterson, Flora Jay, Sriram Sankararaman, Susanna  
857 Sawyer, Anja Heinze, et al. 2014. “The Complete Genome Sequence of a Neanderthal from  
858 the Altai Mountains.” *Nature* 505 (7481): 43–49. <https://doi.org/10.1038/nature12886>.
- 859 Putilov, Arcady A., Vladimir B. Dorokhov, and Michael G. Poluektov. 2018. “How Have Our  
860 Clocks Evolved? Adaptive and Demographic History of the out-of-African Dispersal Told  
861 by Polymorphic Loci in Circadian Genes.” *Chronobiology International* 35 (4): 511–532.  
862 <https://doi.org/10.1080/07420528.2017.1417314>.
- 863 Putilov, Arcady A., Vladimir B. Dorokhov, Alexandra N. Puchkova, Gleb N. Arsenyev, and  
864 Dmitry S. Sveshnikov. 2019. “Genetic-Based Signatures of the Latitudinal Differences in  
865 Chronotype.” *Biological Rhythm Research* 50 (2): 255–71.  
866 <https://doi.org/10.1080/09291016.2018.1465249>.
- 867 Racimo, Fernando, David Gokhman, Matteo Fumagalli, Amy Ko, Torben Hansen, Ida Moltke,  
868 Anders Albrechtsen, Liran Carmel, Emilia Huerta-Sanchez, and Rasmus Nielsen. 2017.  
869 “Archaic Adaptive Introgression in TBX15/WARS2.” *Molecular Biology and Evolution* 34  
870 (3): 509–24. <https://doi.org/10.1093/molbev/msw283>.
- 871 Racimo, Fernando, Davide Marnetto, and Emilia Huerta-Sánchez. 2017. “Signatures of Archaic  
872 Adaptive Introgression in Present-Day Human Populations.” *Molecular Biology and*  
873 *Evolution* 34 (2): 296–317. <https://doi.org/10.1093/molbev/msw216>.
- 874 Racimo, Fernando, Sriram Sankararaman, Rasmus Nielsen, and Emilia Huerta-Sánchez. 2015.  
875 “Evidence for Archaic Adaptive Introgression in Humans.” *Nature Reviews Genetics* 16 (6):  
876 359–71. <https://doi.org/10.1038/nrg3936>.
- 877 Randler, Christoph, and Arash Rahafar. 2017. “Latitude Affects Morningness- Eveningness:  
878 Evidence for the Environment Hypothesis Based on a Systematic Review.” *Nature*  
879 *Publishing Group* 7 (39976): 1–6. <https://doi.org/10.1038/srep39976>.
- 880 Rinker, David C., Corinne N. Simonti, Evonne McArthur, Douglas Shaw, Emily Hodges, and  
881 John A. Capra. 2020. “Neanderthal Introgression Reintroduced Functional Ancestral Alleles

- 882       Lost in Eurasian Populations.” *Nature Ecology and Evolution* 4 (10): 1332–41.  
883       <https://doi.org/10.1038/s41559-020-1261-z>.
- 884 Sandrelli, Federica, Eran Tauber, Mirko Pegoraro, Gabriella Mazzotta, Paola Cisotto, Johannes  
885 Landskron, Ralf Stanewsky, et al. 2007. “A Molecular Basis for Natural Selection at the  
886 Timeless Locus in *Drosophila Melanogaster*.” *Science* 316 (5833): 1898–1900.  
887       <https://doi.org/10.1126/science.1138426>.
- 888 Sankararaman, Sriram, Nick Patterson, Heng Li, Svante Pääbo, and David Reich. 2012. “The  
889 Date of Interbreeding between Neandertals and Modern Humans.” *PLoS Genetics* 8  
890 (e1002947). <https://doi.org/10.1371/journal.pgen.1002947>.
- 891 Shi, Yan, Li Liu, Tsuyoshi Hamada, Jonathan A. Nowak, Marios Giannakis, Yanan Ma,  
892 Mingyang Song, et al. 2020. “Night-Shift Work Duration and Risk of Colorectal Cancer  
893 According to IRS1 and IRS2 Expression.” *Cancer Epidemiology Biomarkers and  
894 Prevention*. <https://doi.org/10.1158/1055-9965.EPI-19-0325>.
- 895 Skoglund, Pontus, and Iain Mathieson. 2018. “Ancient Genomics of Modern Humans: The First  
896 Decade.” *Annual Review of Genomics and Human Genetics*. Annual Reviews Inc.  
897       <https://doi.org/10.1146/annurev-genom-083117-021749>.
- 898 Skov, Laurits, Moisés Coll Macià, Garðar Sveinbjörnsson, Fabrizio Mafessoni, Elise A. Lucotte,  
899 Margret S. Einarsdóttir, Hakon Jonsson, et al. 2020. “The Nature of Neanderthal  
900 Introgression Revealed by 27,566 Icelandic Genomes.” *Nature* 582 (7810): 78–83.  
901       <https://doi.org/10.1038/s41586-020-2225-9>.
- 902 Srinivasan, Venkataramanujan, Marcel Smits, Warren Spence, Alan Lowe, Leonid Kayumov,  
903 Seithikurippu Pandi-Perumal, Barbara Parry, and Daniel Cardinali. 2006. “Melatonin in  
904 Mood Disorders.” *World Journal of Biological Psychiatry*.  
905       <https://doi.org/10.1080/15622970600571822>.
- 906 Stringer, Chris. 2016. “The Origin and Evolution of *Homo Sapiens*.” *Philosophical Transactions  
907 of the Royal Society B: Biological Sciences* 371 (1698): 20150237.  
908       <https://doi.org/10.1098/rstb.2015.0237>.
- 909 Tauber, Eran, Mauro Zordan, Federica Sandrelli, Mirko Pegoraro, Nicolò Osterwalder, Carlo  
910 Breda, Andrea Daga, et al. 2007. “Natural Selection Favors a Newly Derived Timeless  
911 Allele in *Drosophila Melanogaster*.” *Science* 316 (5833): 1895–98.  
912       <https://doi.org/10.1126/science.1138412>.
- 913 Taylor, Briana J., and Brant P. Hasler. 2018. “Chronotype and Mental Health: Recent  
914 Advances.” *Current Psychiatry Reports* 20 (8). <https://doi.org/10.1007/s11920-018-0925-8>.
- 915 Telis, Natalie, Robin Aguilar, and Kelley Harris. 2020. “Selection against Archaic Hominin  
916 Genetic Variation in Regulatory Regions.” *Nature Ecology and Evolution* 4 (11): 1558–66.  
917       <https://doi.org/10.1038/s41559-020-01284-0>.
- 918 Vernot, Benjamin, and Joshua M. Akey. 2014. “Resurrecting Surviving Neandertal Lineages  
919 from Modern Human Genomes.” *Science* 343 (6174): 1017–21.  
920       <https://doi.org/10.1126/science.1245938>.
- 921 Vernot, Benjamin, Serena Tucci, Janet Kelso, Joshua G. Schraiber, Aaron B. Wolf, Rachel M.  
922 Gittelman, Michael Dannemann, et al. 2016. “Excavating Neandertal and Denisovan DNA  
923 from the Genomes of Melanesian Individuals.” *Science* 352 (6282): 235–39.  
924       <https://doi.org/10.1126/science.aad9416>.
- 925 Villanea, Fernando A., and Joshua G. Schraiber. 2019. “Multiple Episodes of Interbreeding  
926 between Neanderthal and Modern Humans.” *Nature Ecology and Evolution* 3 (1): 39–44.  
927       <https://doi.org/10.1038/s41559-018-0735-8>.



- 928 Yousef, Einas, Noha Mitwally, Noha Noufal, and Muhammad Ramzan Tahir. 2020. “Shift Work  
929 and Risk of Skin Cancer: A Systematic Review and Meta-Analysis.” *Scientific Reports* 10  
930 (1): 1–11. <https://doi.org/10.1038/s41598-020-59035-x>.
- 931 Zhang, Qingzhu, Hongyu Li, Rui Li, Ruibo Hu, Chengming Fan, Fulu Chen, Zonghua Wang, Xu  
932 Liu, Yongfu Fu, and Chentao Lin. 2008. “Association of the Circadian Rhythmic  
933 Expression of GmCRY1a with a Latitudinal Cline in Photoperiodic Flowering of Soybean.”  
934 *Proceedings of the National Academy of Sciences of the United States of America* 105 (52):  
935 21028–33. <https://doi.org/10.1073/pnas.0810585105>.
- 936 Zhang, Xinjun, Bernard Kim, Armaan Singh, Sriram Sankararaman, Arun Durvasula, and Kirk E  
937 Lohmueller. 2023. “MaLAdapt Reveals Novel Targets of Adaptive Introgression From  
938 Neanderthals and Denisovans in Worldwide Human Populations.” *Molecular Biology and  
939 Evolution* 40 (1): msad001.
- 940
